# Supplementary material
Source: publisher figshare collection journal article supplement (https://karger.figshare.com/ndownloader/files/14413463)
Supplement: Supplementary file 1 [file 14413463]

**Supplemental Figure 3 (Figure S3): Mutations in *PKD2* group patients.**

NCBI reference sequences were used: *PKD2, NM_000279.3.*

**
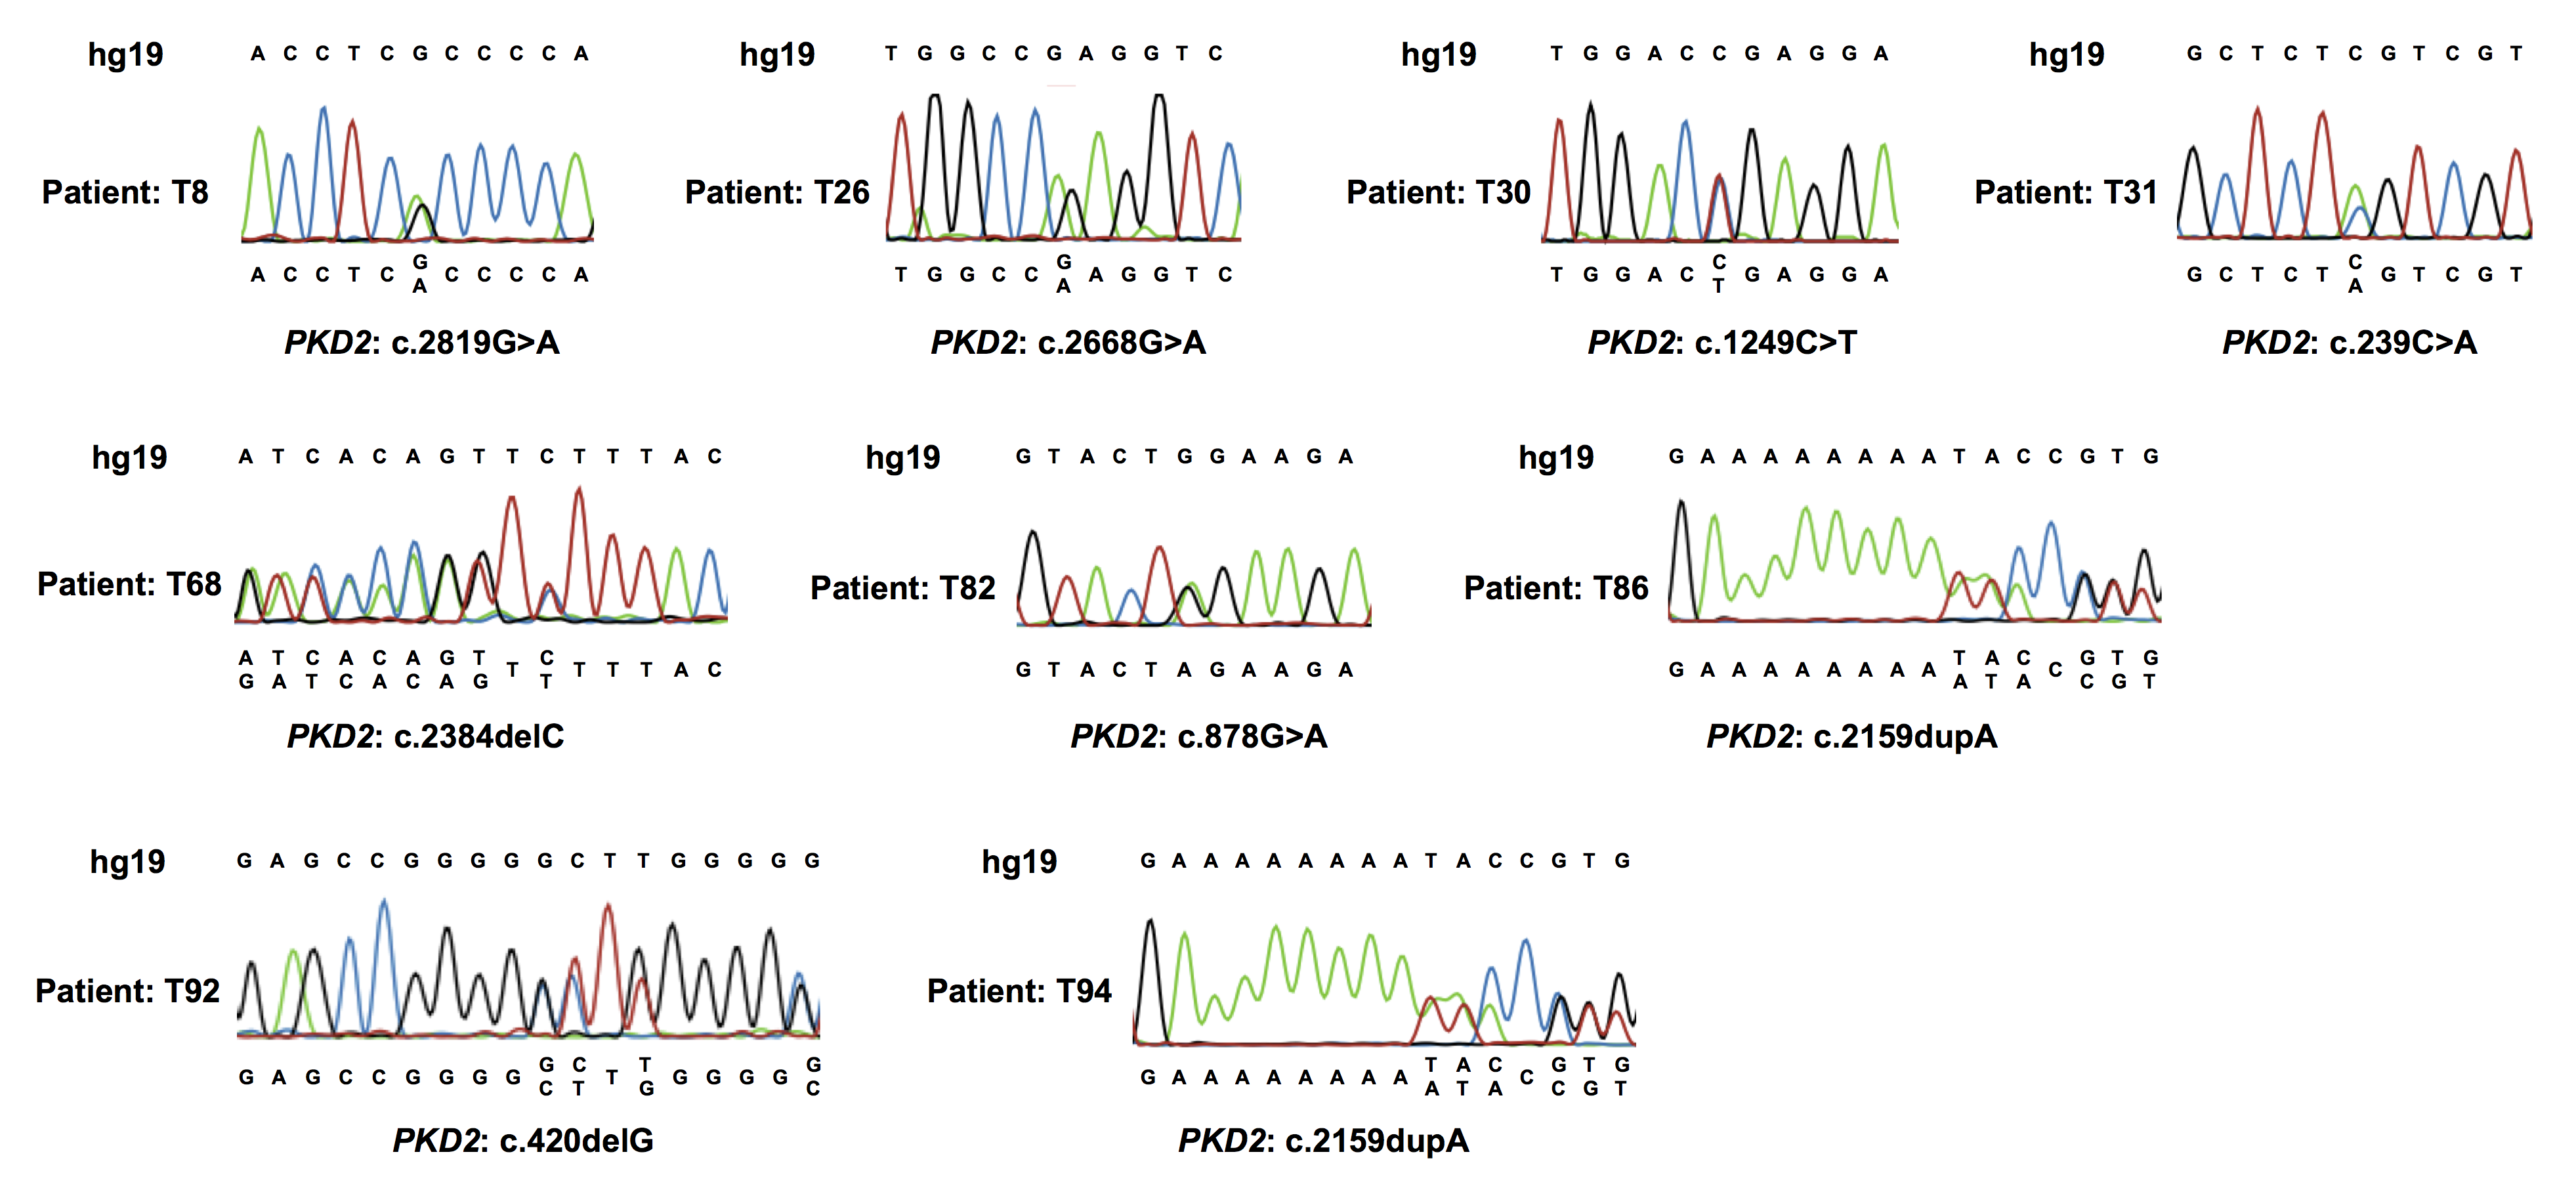
**
